# Supplementary material for: Aberrant Amplitude of Low-Frequency Fluctuation and Degree Centrality within the Default Mode Network in Patients with Vascular Mild Cognitive Impairment
Source: MDPI journal article supplement (doi:10.3390/brainsci11111534), 2021-11-19
Supplement: s1 [file s1]

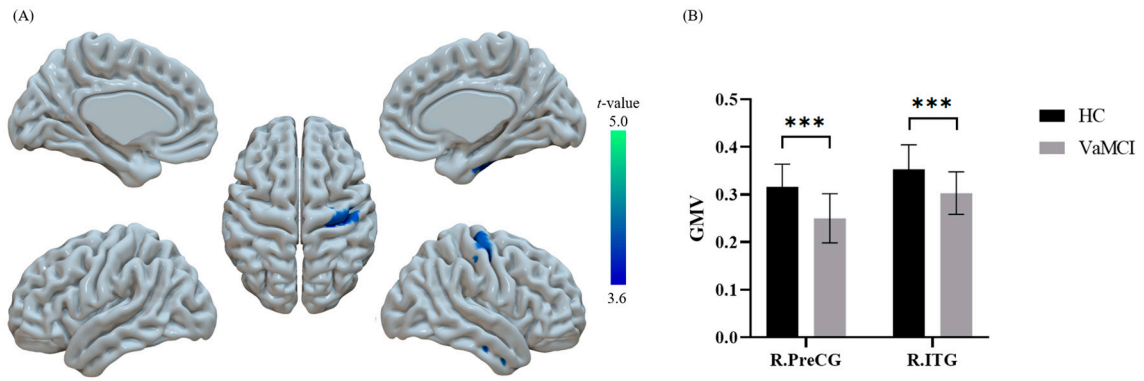

**Figure S1.** Altered brain regions of GMV in the VaMCI group compared with HCs. (A) GM. atrophy in the R.PreCG and R.ITG in the VaMCI group. Results were thresholded at a voxel-wise  $p < 0.001$  (uncorrected) combined with a cluster-wise  $p < 0.05$  (FWE corrected). Color bar indicates the  $t$ -value. (B) Comparison of significant brain regions between the VaMCI group and HC group of the extracted GMV values in the R.PreCG and R.ITG. PreCG, precentral gyrus; ITG, inferior temporal. gyrus; L., left; R., right. \*\*\*  $p < 0.001$ .
